# Supplementary material for: SERS quantitative analysis of trace HSA with a Coomassie brilliant blue G-250 molecular probe in nanogold sol substrate
Source: Royal Society of Chemistry journal article supplement (doi:10.1039/c4ra11778f), 2014-12-04
Supplement: c4ra11778f1.pdf [file c4ra11778f1.pdf]

## SERS quantitative analysis of trace HSA with Coomassie brilliant blue G-250 molecular probe in nanogold sol substrate

Aihui Liang<sup>§\*</sup>, Zujun Lu<sup>§</sup>, Qingye Liu, Xinghui Zhang, Guiqing Wen, Zhiliang Jiang<sup>\*</sup>

Key Laboratory of Ecology of Rare and Endangered Species and Environmental Protection of Ministry Education, Guangxi Key Laboratory of Environmental Pollution Control Theory and Technology, Guangxi Normal University, Guilin 541004, China

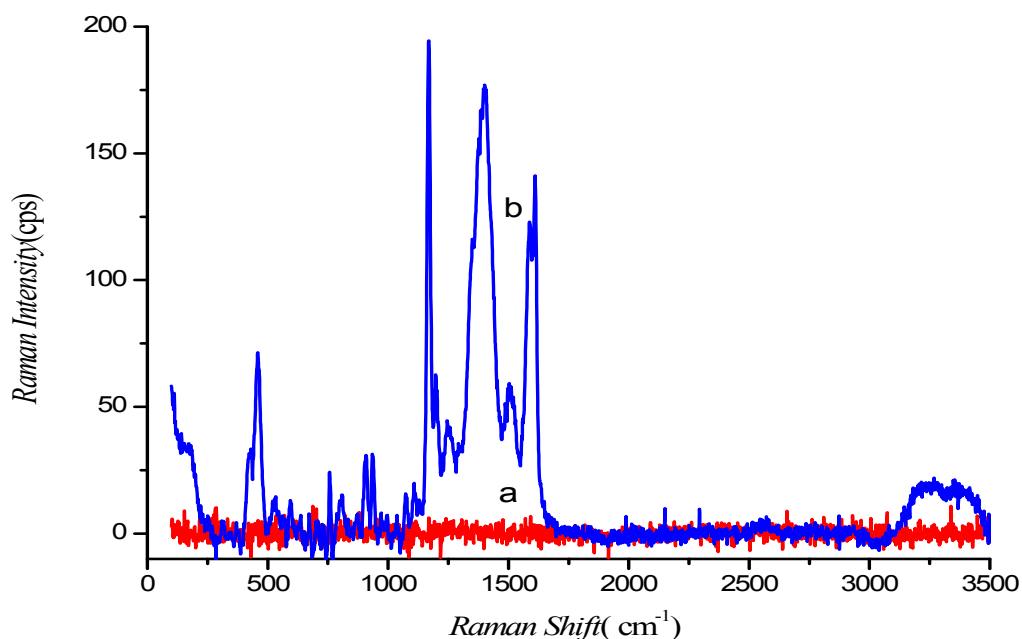

**Figure S1** The normal Raman and SERS spectra of CBB.

(a) pH 6.6 PBS- $1 \times 10^{-3}$  mol/L CBB-0.06 mol/L NaCl; (b) 16.74 mg/L Au-pH 6.6 PBS- $2.34 \times 10^{-7}$  mol/L CBBG-0.06 mol/L NaCl

**Table S1** Enhanced factor ( $E_f$ ) for different SERS peak <sup>a</sup>

| Raman peak (cm <sup>-1</sup> ) | $I_{\text{SERS}}$ | $K_{\text{SERS}}$ (L/mol) | $I_{\text{NRS}}$ | $K_{\text{NRS}}$ (L/mol) | $E_f$             |
|--------------------------------|-------------------|---------------------------|------------------|--------------------------|-------------------|
| 464                            | 64                | $2.7 \times 10^8$         | 1.4              | 1423                     | $1.9 \times 10^5$ |
| 757                            | 24                | $1.0 \times 10^8$         | 0.4              | 449                      | $2.3 \times 10^5$ |
| 907                            | 30                | $1.3 \times 10^8$         | 0.1              | 147                      | $8.8 \times 10^5$ |
| 936                            | 30                | $1.3 \times 10^8$         | 1.0              | 1043                     | $1.2 \times 10^5$ |
| 1171                           | 180               | $7.7 \times 10^8$         | 2.7              | 2666                     | $2.9 \times 10^5$ |
| 1403                           | 173               | $7.4 \times 10^8$         | 3.1              | 3129                     | $2.4 \times 10^5$ |
| 1612                           | 136               | $5.8 \times 10^8$         | 0.6              | 608                      | $9.6 \times 10^5$ |

<sup>a</sup>  $C_1 = 2.34 \times 10^{-7}$  mol/L CBBG and  $C_0 = 1 \times 10^{-3}$  mol/L CBBG,  $K_{\text{SERS}} = I_{\text{SERS}}/C_1$ ,  $K_{\text{NRS}} = I_{\text{NRS}}/C_0$ ,  $E_f = K_{\text{SERS}}/K_{\text{NRS}}$ .

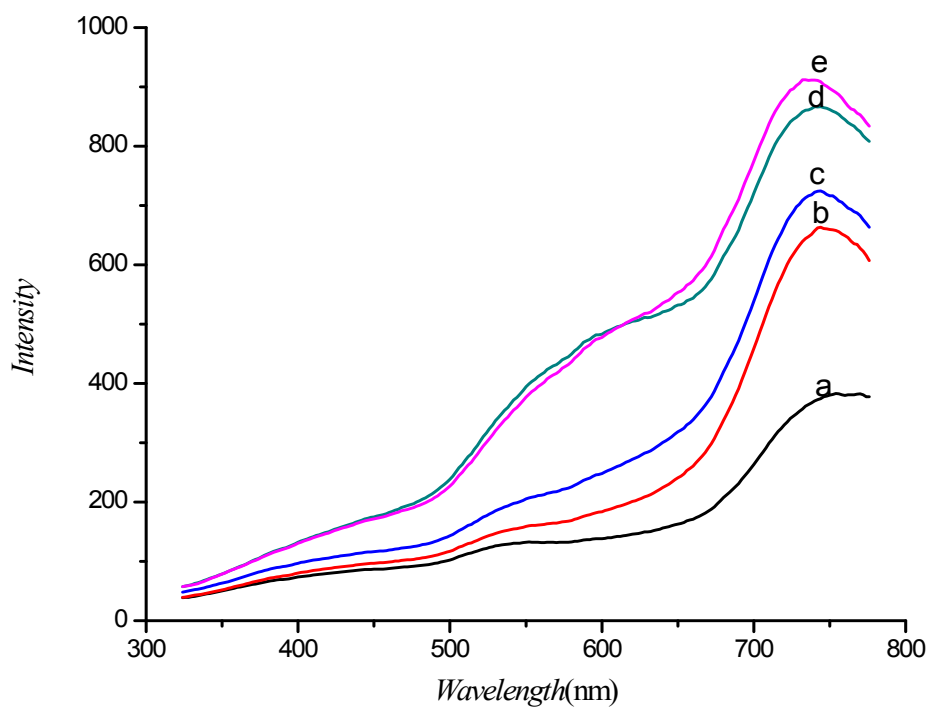

**Figure S2** RRS spectra of the PBS-NaCl-NG-CBB system

(a) 16.74 mg/L Au-pH 6.6 PBS-0.06 mol/L NaCl; (b) a- $0.29 \times 10^{-7}$  mol/L CBB; (c) a- $1.17 \times 10^{-7}$  mol/L CBB; (d) a- $3.51 \times 10^{-7}$  mol/L CBB; (e) a- $4.68 \times 10^{-7}$  mol/L CBB.

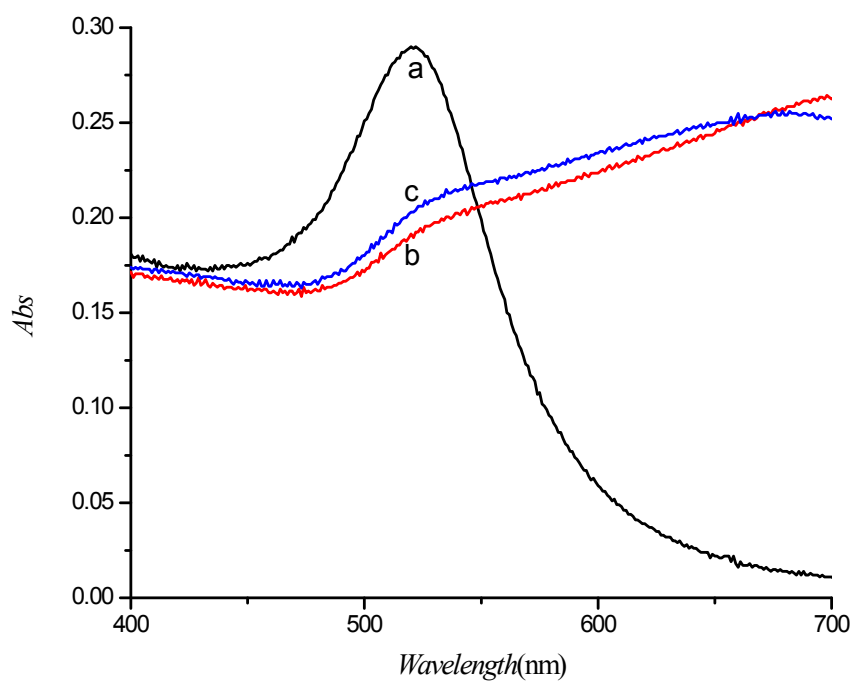

**Figure S3** Absorption spectra of the PBS-NaCl- NG-CBB-HSA system

(a) 16.74 mg/L Au-pH 6.6 PBS; (b) a-0.06 mol/L NaCl; (c) b- $3.51 \times 10^{-7}$  mol/L CBB-0.5 mg/L HSA

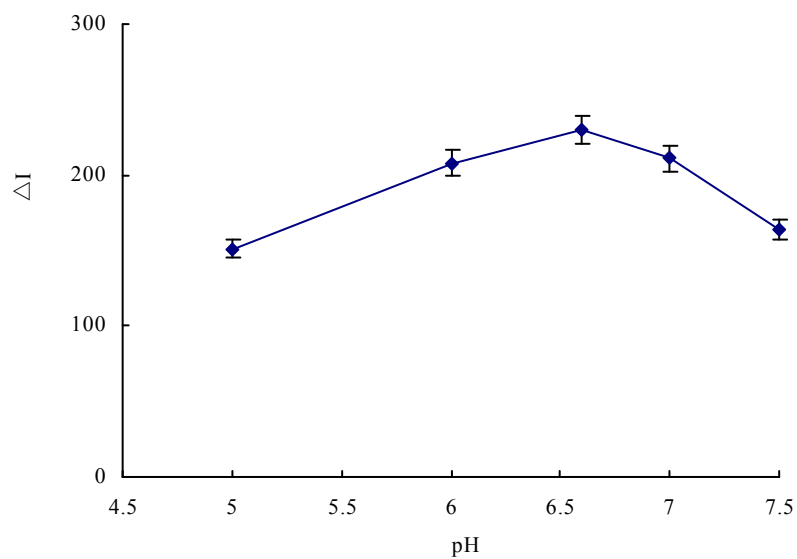

**Figure S4** Effect of pH on the  $\Delta I$  value

16.74 mg/L Au- $5.86 \times 10^{-7}$  mol/L CBB-0.06 mol/L NaCl-1.0 mg/L HSA

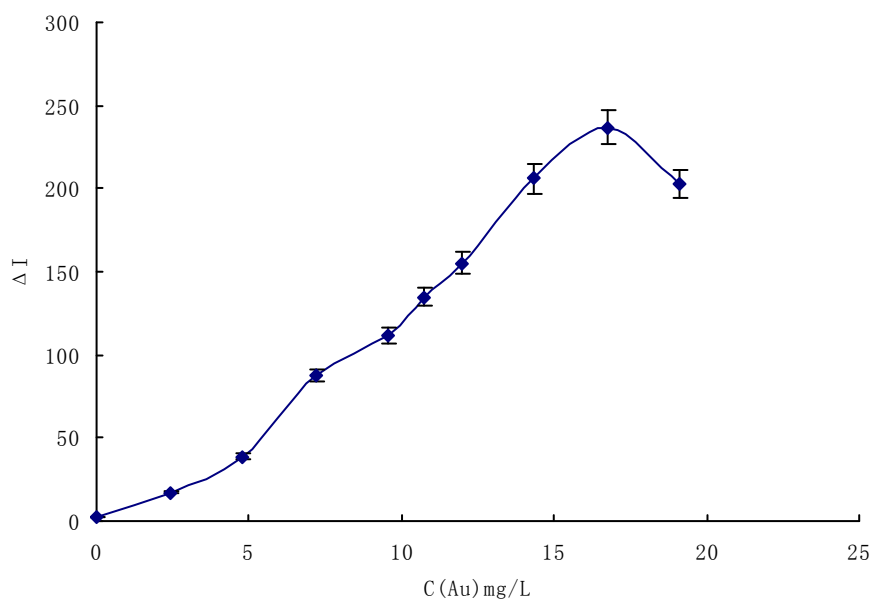

**Figure S5** Effect of NG concentration on the  $\Delta I$  value

pH 6.6 PBS - $5.86 \times 10^{-7}$  mol/L CBBG-0.06 mol/L NaCl-1.0 mg/L HSA

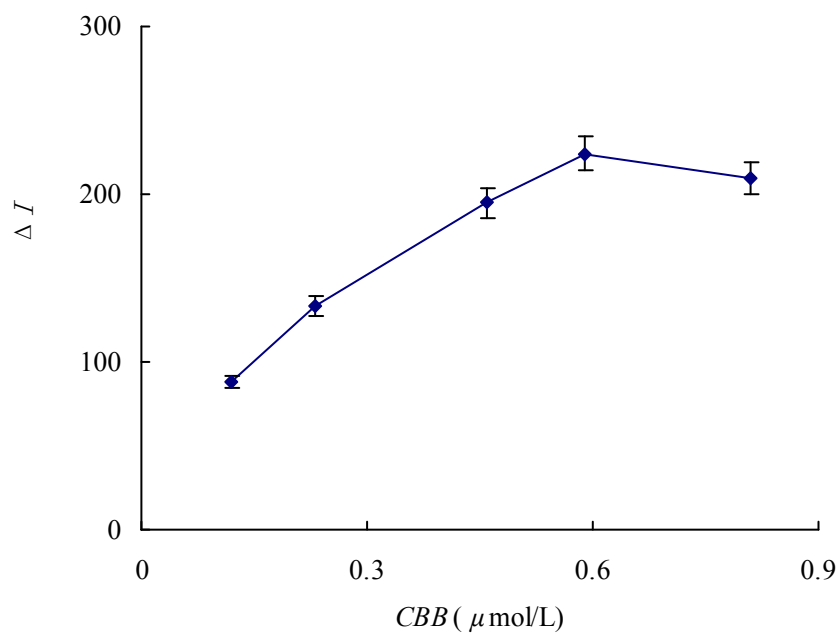

**Figure S6** Effect of CBB concentration on  $\Delta I$   
 pH6.6 PBS-16.74 mg/L Au-0.06 mol/L NaCl -1.0  $\mu\text{g/mL}$  HSA

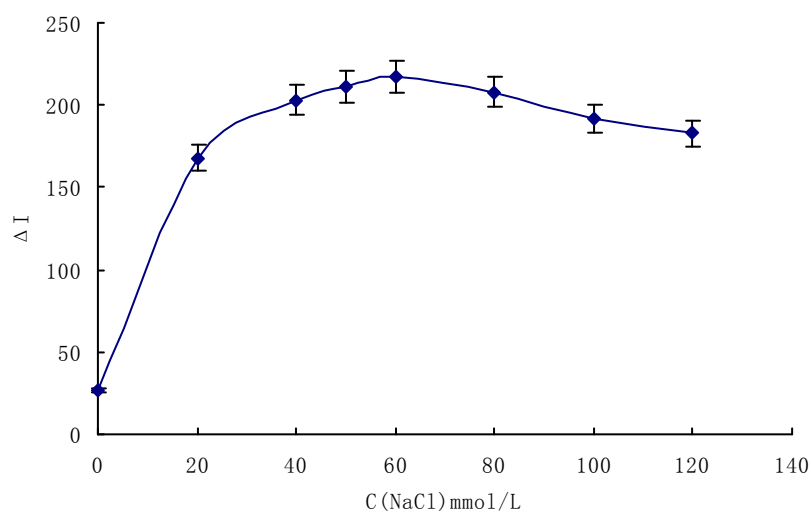

**Figure S7** Effect of NaCl concentration on  $\Delta I$   
 pH 6.6 PBS - $5.86 \times 10^{-7}$  mol/L CBBG-16.74 mg/L Au -1.0 mg/L HSA

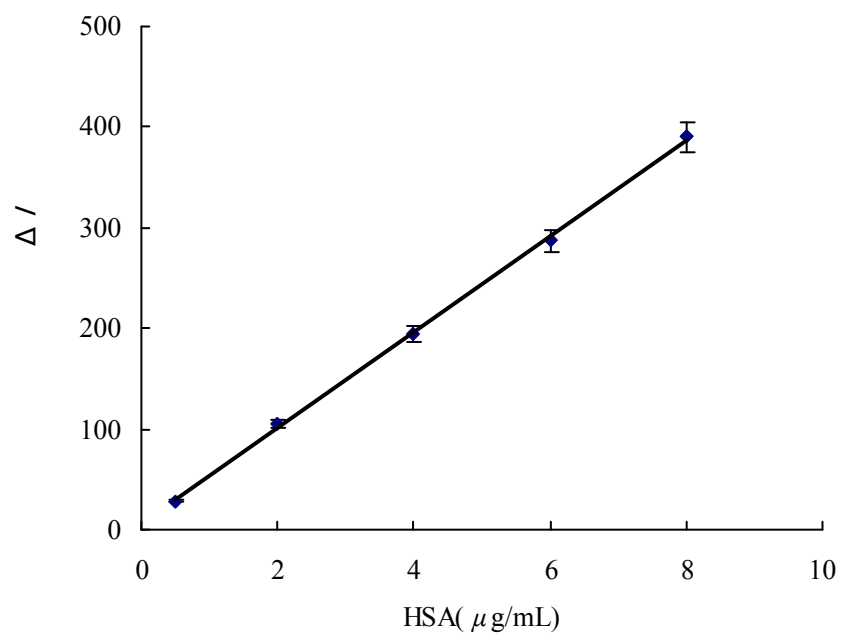

**Figure S8** working curve
